# Supplementary material
Source: publisher figshare collection journal article supplement (https://frontiersin.figshare.com/ndownloader/files/27728004)
Supplement: Supplementary file 1 [file 27728004]

## *Supplementary Material*

### 1 Supplementary Figures and Tables

#### 1.1 Supplementary Tables

**Supplemental Table 1. Summary table indices for each plot.** Site names are abbreviated (Off=offshore, Mid= midchannel, Near=nearshore). Total prevalence is the fraction of colonies at a plot that showed signs of SCTL D at some point during the survey period. The Shannon diversity index (H) was calculated by the ‘diversity’ function from the Vegan package in R. Species richness is the total number of unique species at a quadrat. Colony density was measured as the number of individual colonies per m<sup>2</sup>. The average nearest neighbor distance is measured in m and the average maximum width was measured in cm.

| Site | Quadrat | Number of colonies | Total prevalence | Shannon diversity index | Species richness | Colony density | Avg. nearest neighbor | Avg. maximum width |
|------|---------|--------------------|------------------|-------------------------|------------------|----------------|-----------------------|--------------------|
| Off  | 27      | 225                | 0.04             | 1.42                    | 9                | 2.25           | 0.32                  | 14.10              |
|      | 28      | 322                | 0.05             | 1.61                    | 13               | 3.22           | 0.29                  | 16.11              |
| Mid  | 23      | 275                | 0.05             | 1.63                    | 11               | 2.75           | 0.31                  | 18.59              |
|      | 25      | 418                | 0.04             | 1.50                    | 13               | 4.18           | 0.26                  | 17.18              |
| Near | 45      | 302                | 0.16             | 2.10                    | 14               | 3.02           | 0.31                  | 30.78              |
|      | 47      | 470                | 0.16             | 2.09                    | 14               | 4.7            | 0.25                  | 33.84              |

**Supplemental Table 2. Timing of site visits, activities that occurred, and disease state at each site monitored for stony coral tissue loss disease (SCTLD).**

| Date                | Survey Group | Activities                                                                   | Disease state |
|---------------------|--------------|------------------------------------------------------------------------------|---------------|
| Mid-May             | Mote         | Site establishment                                                           | No Disease    |
| June 1, 2018        | Mote         | Complete disease surveys                                                     | No Disease    |
| June 21, 2018       | Mote         | Complete disease surveys                                                     | No Disease    |
| July 16, 2018       | Mote         | Complete disease surveys; photos for mosaics                                 | No Disease    |
| July 17, 2018       | Mote         | Complete disease surveys; photos for mosaics                                 | No Disease    |
| August 1, 2018      | Mote/FWC     | Complete disease surveys, collection of percent old mortality for each coral | No Disease    |
| August 7, 2018      | Mote/FWC     | Complete disease surveys, collection of percent old mortality for each coral | No Disease    |
| August 22, 2018     | FWC          | Quick assessment for disease activity                                        | No Disease    |
| September 7, 2018   | FWC          | Quick assessment for disease activity                                        | No Disease    |
| September 14, 2018  | FWC          | Quick assessment for disease activity                                        | No Disease    |
| September 20, 2018  | FWC          | Quick assessment for disease activity                                        | No Disease    |
| September 25, 2018  | FWC          | Quick assessment for disease activity                                        | No Disease    |
| Early October, 2018 | FWC          | Quick assessment for disease activity                                        | SCTLD present |
| October 30, 2018    | Mote/FWC     | Complete disease surveys                                                     | SCTLD         |
| November 9, 2018    | Mote         | Disease surveys at mid-channel and nearshore site                            | SCTLD         |
| November 12, 2018   | Mote         | Disease surveys at offshore site                                             | SCTLD         |
| November 29, 2018   | Mote         | Complete disease surveys at all sites                                        | SCTLD         |
| December 12, 2018   | Mote         | Complete disease surveys at all sites                                        | SCTLD         |
| January 4, 2019     | Mote         | Complete disease surveys at all sites                                        | SCTLD         |
| January 18, 2019    | Mote         | Complete disease surveys at all sites                                        | SCTLD         |
| February 1, 2019    | Mote         | Complete disease surveys at all sites                                        | SCTLD         |
| March 4, 2019       | Mote         | Complete disease surveys at all sites                                        | SCTLD         |
| March 21, 2019      | Mote         | Complete disease surveys at all sites                                        | SCTLD         |
| April 11, 2019      | Mote         | Complete disease surveys at all sites                                        | SCTLD         |
| May 2, 2019         | Mote         | Complete disease surveys at all sites                                        | SCTLD         |
| May 16, 2019        | Mote         | Complete disease surveys at all sites                                        | SCTLD         |
| May 28, 2019        | Mote         | Complete disease surveys at all sites                                        | SCTLD         |
| June 13, 2019       | Mote         | Complete disease surveys at all sites                                        | SCTLD         |
| July 1, 2019        | Mote         | Complete disease surveys at all sites                                        | SCTLD         |
| July 22, 2019       | Mote         | Complete disease surveys at all sites                                        | SCTLD         |
| August 16, 2019     | Mote         | Complete disease surveys at all sites                                        | SCTLD         |
| September 17, 2019  | Mote         | Complete disease surveys at all sites                                        | SCTLD         |
| October 14, 2019    | Mote         | Complete disease surveys at all sites                                        | SCTLD         |
| November 12, 2019   | Mote         | Complete disease surveys at all sites                                        | SCTLD         |
| December 6, 2019    | Mote         | Complete disease surveys at all sites                                        | SCTLD         |

**Supplemental Table 3. Eigenvalues of the dimensions (principal components) and their percent of variance explained for the principal component analysis of the 11 susceptible species at the 6 quadrats.** Species abundances were normalized by the total number of colonies at each quadrat. The maximum number of principal components that can be extracted is  $n-1$ ,  $6-1=5$ . An eigenvalue of  $>1$  indicates that principal components account for more variance than accounted by one of the original variables.

| Dimension | Eigenvalue | Variance Percent | Cumulative Variance Percent |
|-----------|------------|------------------|-----------------------------|
| 1         | 6.79       | 67.9             | 67.9                        |
| 2         | 1.90       | 19.0             | 86.9                        |
| 3         | 1.07       | 10.7             | 97.6                        |
| 4         | 0.13       | 1.3              | 98.9                        |
| 5         | 0.11       | 1.1              | 100                         |

**Supplemental Table 4. Significantly associated variables (out of the 11 susceptible species) with the first principal component.** Output of the dimdesc function in R.

| Species | Correlation | P value |
|---------|-------------|---------|
| Cnat    | 0.98        | 0.0008  |
| Ofav    | 0.97        | 0.0012  |
| Mcav    | 0.97        | 0.0018  |
| Sbou    | 0.85        | 0.0310  |
| Ssid    | -0.95       | 0.0043  |
| Dsto    | -0.97       | 0.0012  |

**Supplemental Table 5. Species contributions to the PCA dimensions (for the analysis including just the 11 susceptible species), ordered by contribution to Dim1.** Variables with high contribution to Dim 1 and Dim 2 are the most important for explaining variability in the data set.

| Species Variable | Dim 1 | Dim 2 | Dim 3 | Dim 4 | Dim 5 |
|------------------|-------|-------|-------|-------|-------|
| Cnat             | 14.08 | 1.36  | 1.31  | 0.41  | 3.65  |
| Ofav             | 13.89 | 0.01  | 4.07  | 8.56  | 1.58  |
| Dsto             | 13.89 | 0.70  | 0.77  | 22.79 | 5.30  |
| Mcav             | 13.72 | 3.48  | 0.01  | 0.48  | 1.18  |
| Ssid             | 13.18 | 4.55  | 0.89  | 0.82  | 7.59  |
| Sbou             | 10.71 | 9.74  | 3.1   | 2.58  | 46.71 |
| Pstr             | 8.65  | 18.89 | 0.89  | 24.46 | 11.61 |
| Oann             | 6.66  | 26.36 | 2.96  | 0.47  | 13.59 |
| Sint             | 4.26  | 34.42 | 0.04  | 36.78 | 8.15  |
| Dlab             | 0.96  | 0.49  | 85.96 | 2.65  | 0.64  |

**Supplemental Table 6. Total abundance (tot) of each species by site, total disease prevalence (dis) of each species by site, and percent mortality of each species by site.**

| Species | Mid Channel |     |             | Offshore |     |             | Nearshore |     |             |
|---------|-------------|-----|-------------|----------|-----|-------------|-----------|-----|-------------|
|         | Tot         | Dis | Mortality % | Tot      | Dis | Mortality % | Tot       | Dis | Mortality % |
| AAGA    | 0           | 0   | NA          | 1        | 0   | 0           | 0         | 0   | NA          |
| ACER    | 0           | 0   | NA          | 13       | 0   | 0           | 0         | 0   | NA          |
| CNAT    | 4           | 0   | 25          | 1        | 0   | 0           | 56        | 37  | 77          |
| DLAB    | 3           | 1   | 33          | 4        | 2   | 75          | 6         | 3   | 83          |
| DSTO    | 42          | 20  | 71          | 34       | 12  | 71          | 12        | 5   | 50          |
| MCAV    | 10          | 0   | 10          | 10       | 2   | 20          | 134       | 19  | 1           |
| MMEA    | 0           | 0   | NA          | 0        | 0   | NA          | 1         | 0   | 100         |
| MYCE    | 0           | 0   | NA          | 0        | 0   | NA          | 2         | 0   | 50          |
| OANN    | 0           | 0   | NA          | 0        | 0   | NA          | 33        | 11  | 12          |
| OCUL    | 0           | 0   | NA          | 0        | 0   | NA          | 2         | 0   | 100         |
| ODIF    | 0           | 0   | NA          | 0        | 0   | NA          | 2         | 0   | 0           |
| OFAV    | 5           | 0   | 0           | 4        | 1   | 25          | 16        | 3   | 19          |
| PAST    | 171         | 0   | 0           | 134      | 0   | 1           | 135       | 0   | 0           |
| PCLI    | 3           | 1   | 0           | 1        | 0   | 100         | 1         | 0   | 100         |
| PDIV    | 0           | 0   | NA          | 1        | 0   | 0           | 0         | 0   | NA          |
| PPOR    | 9           | 0   | 0           | 0        | 0   | NA          | 0         | 0   | NA          |
| PSTR    | 11          | 3   | 27          | 8        | 1   | 50          | 36        | 24  | 75          |
| SBOU    | 4           | 0   | 0           | 5        | 0   | 0           | 41        | 8   | 12          |
| SINT    | 165         | 1   | 0.6         | 106      | 1   | 0           | 132       | 9   | 0           |
| SRAD    | 2           | 0   | 0           | 0        | 0   | NA          | 7         | 0   | 0           |
| SSID    | 264         | 2   | 0           | 225      | 4   | 0           | 156       | 6   | 0           |

## 1.2 Supplementary Figures

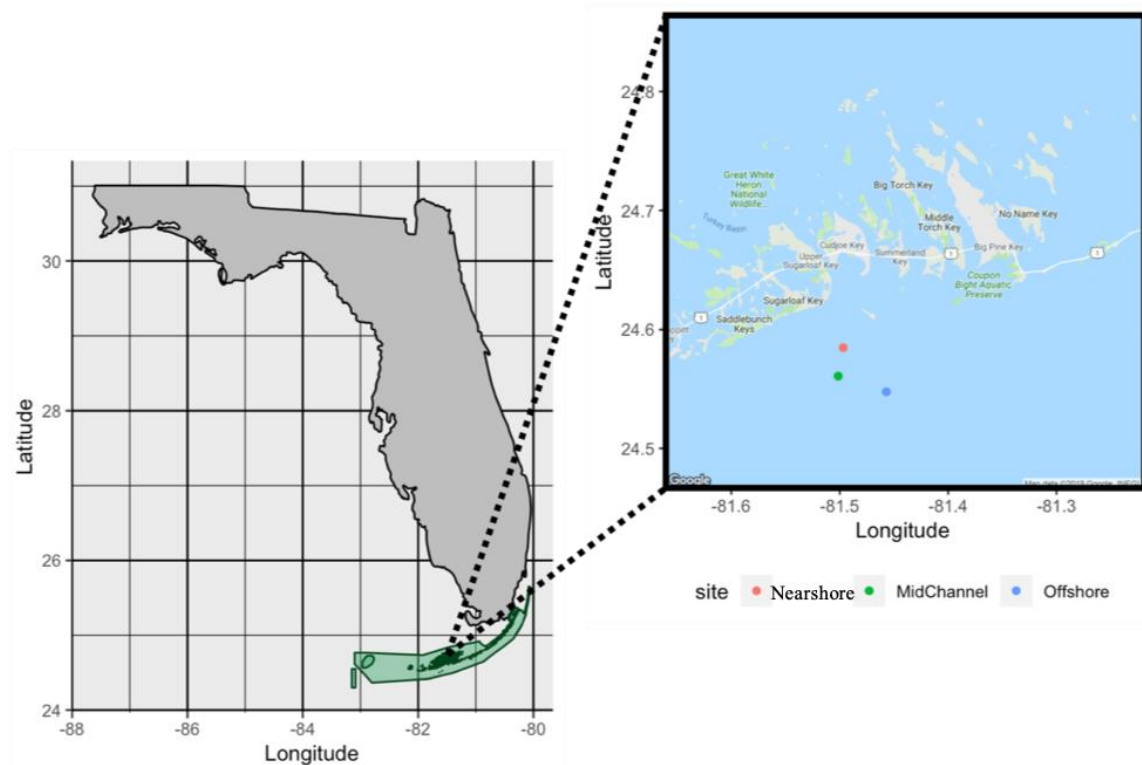

**Supplemental Figure 1. Map of survey sites in the lower Florida Keys.**

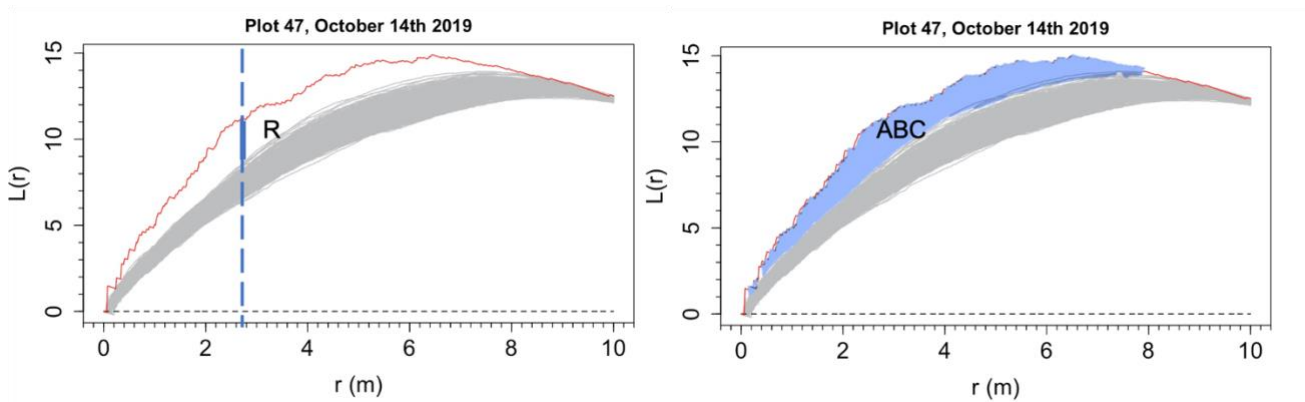

**Supplemental Figure 2. Conceptual diagram of Ripley's K analysis measures R and ABC.** The black dotted line marks  $L(r)=0$ , the red line is the  $L(r)$  for the diseased colonies, and the grey lines are the null distribution of  $L(r)$ . Diseased colonies are significantly more clustered when the red line is above the null distribution. The peak clustering radius (R) is measured as the point on the  $L(r)$  curve for the diseased corals that is farthest (largest  $\Delta y$ ) from the null  $L(r)$  distribution. The area between the realized distribution of Besag's L values for the diseased colonies and those of the null distribution (ABC) is solved for by using Simpson's method for numerical integration and represents the total amount of significant clustering over the radius considered.

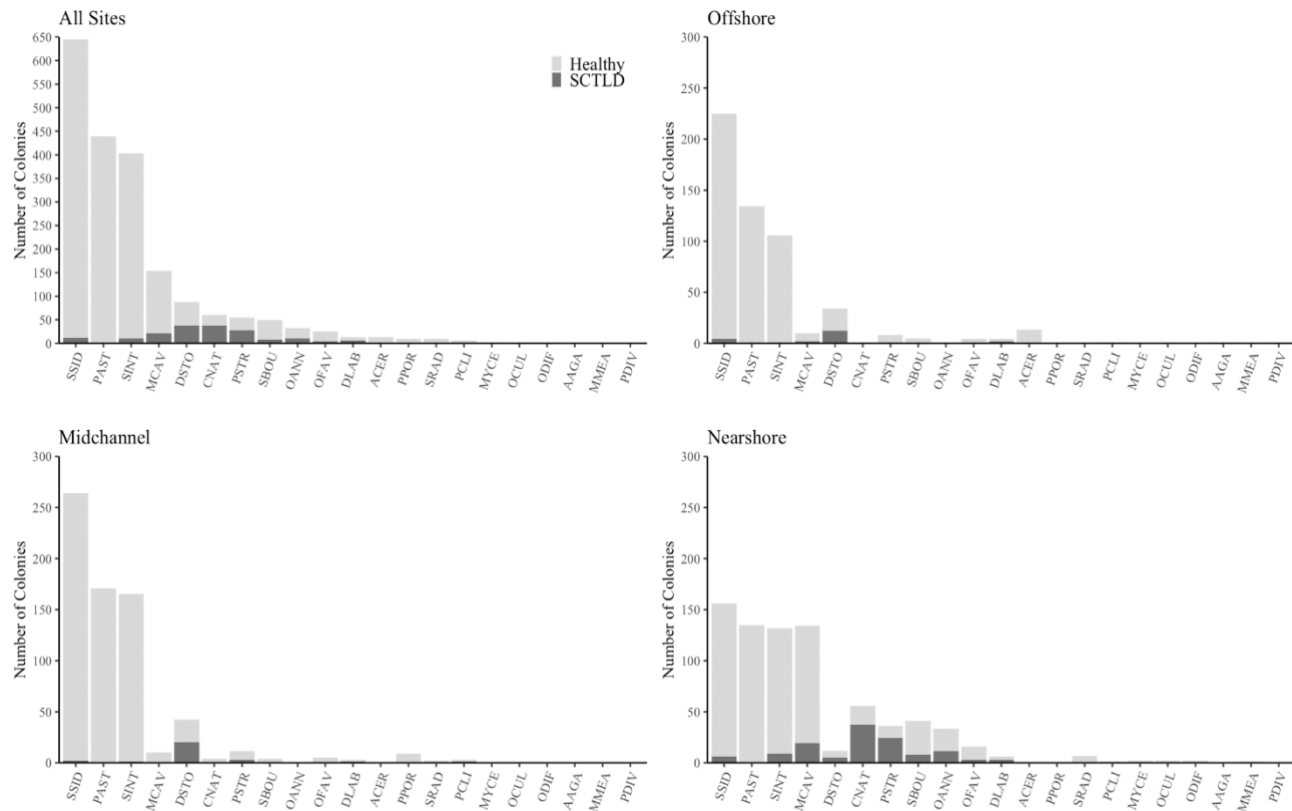

**Supplemental Figure 3. Total number of colonies showing signs of SCTLD compared with the total number of apparently healthy colonies for each coral species over the entire survey period.**

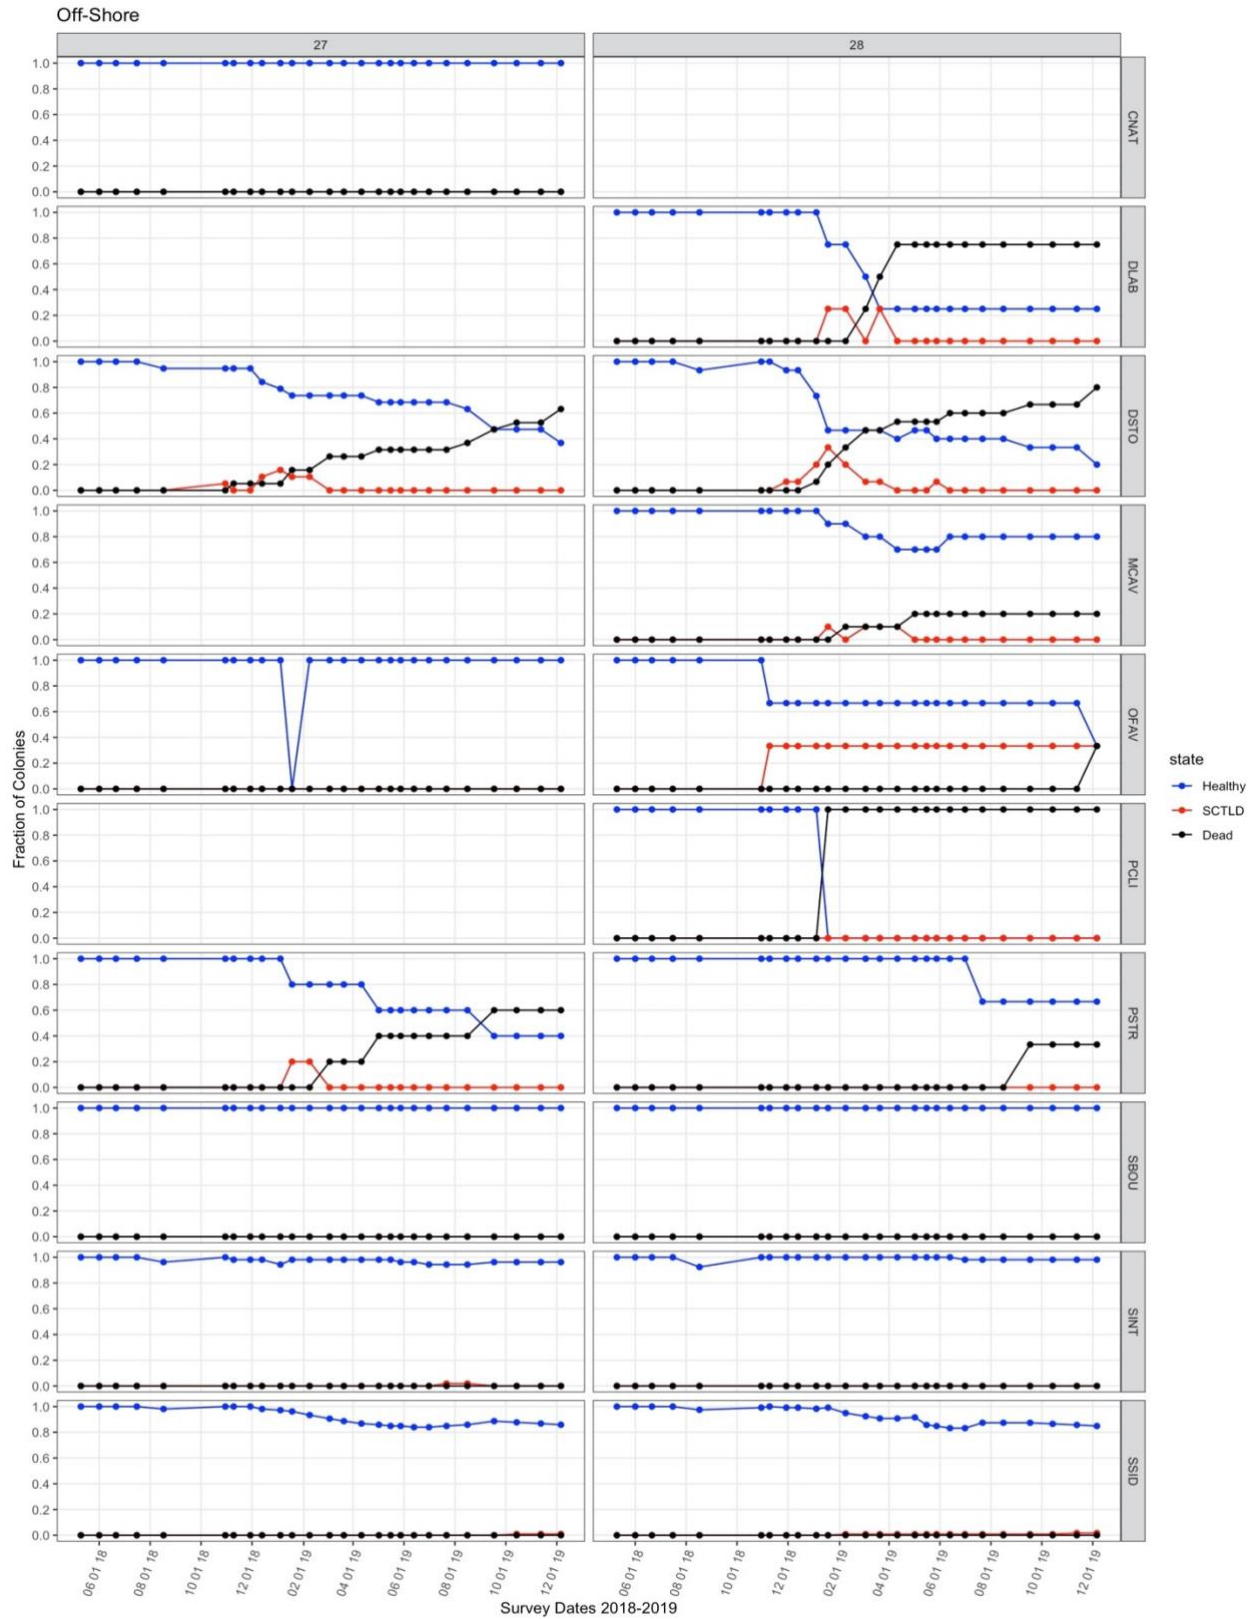

**Supplemental Figure 4.** Temporal dynamics of SCTLD for each species at the offshore site quadrats. Fraction of “unknown” colonies, i.e. not found during a survey, are not shown as they accounted for a low fraction of all colonies. However, they do account for missing fractions when the Healthy, SCTLD, and Dead fractions do not sum to 1.

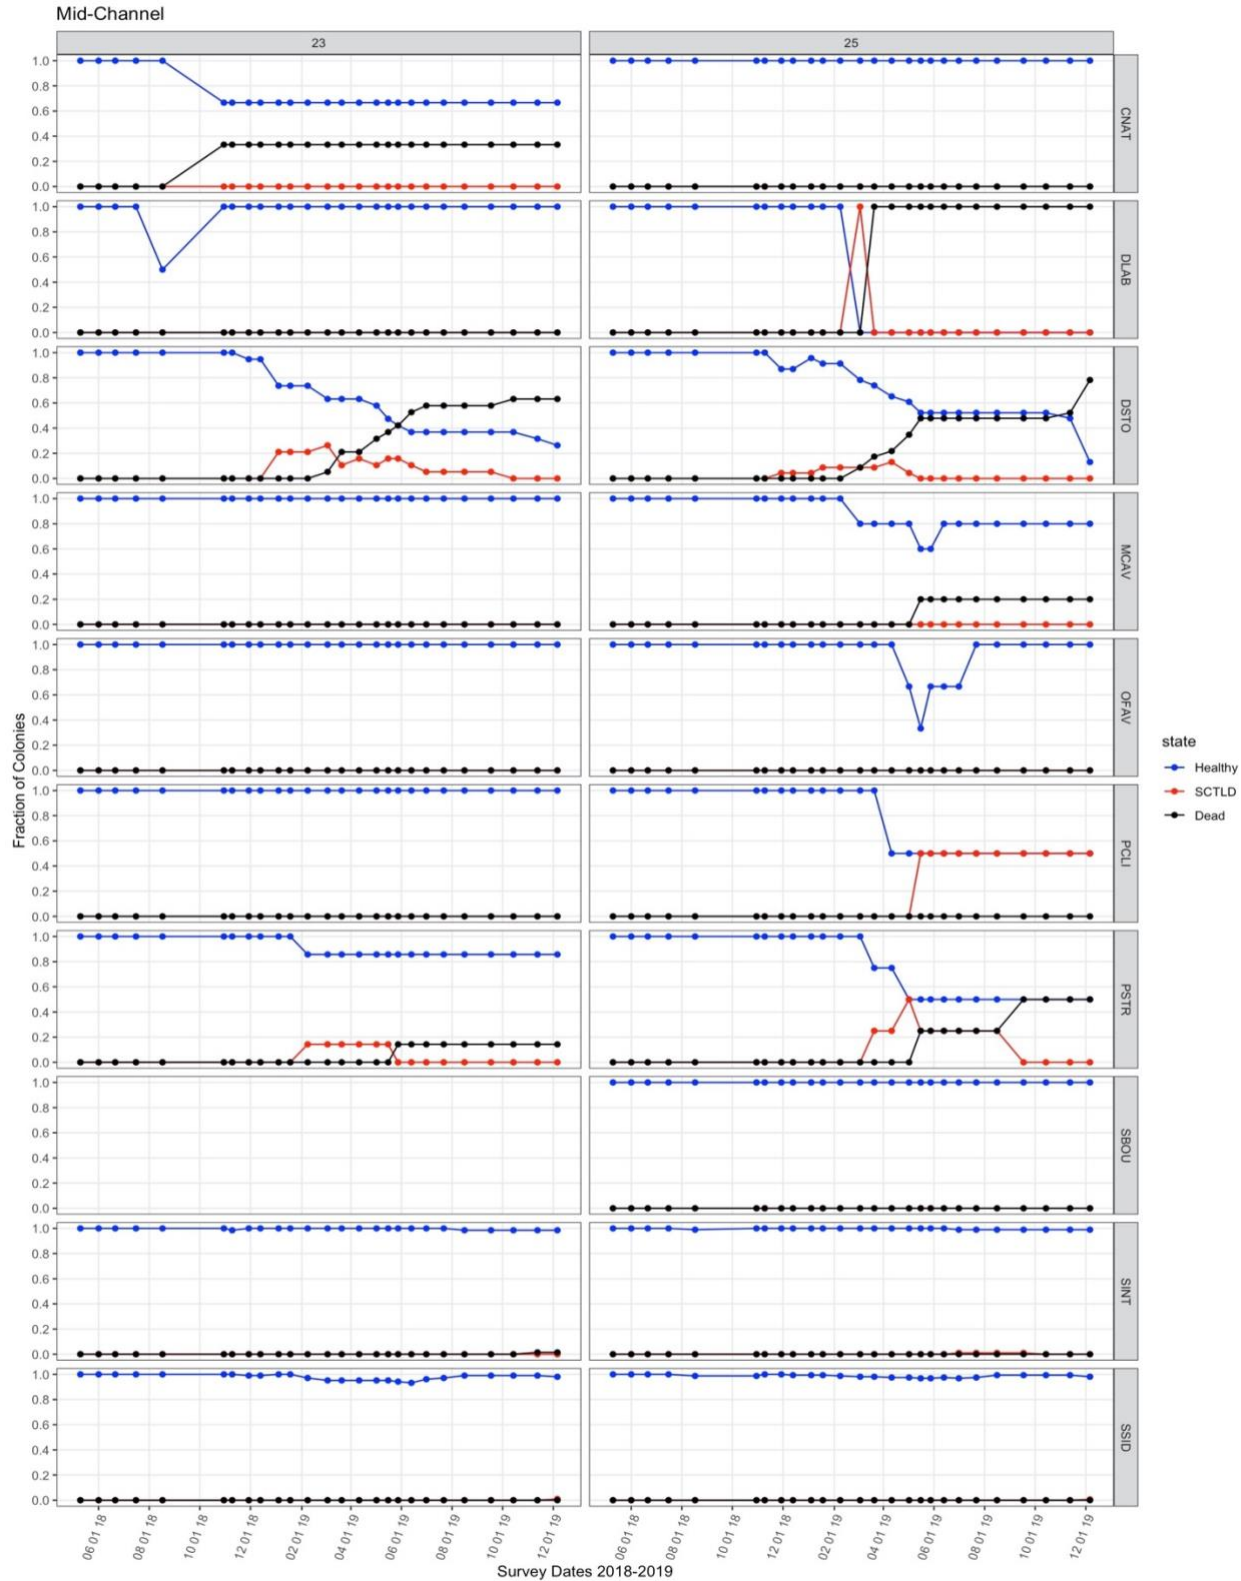

**Supplemental Figure 5. Temporal dynamics of SCTLD for each species at the midchannel site quadrats.** Fraction of “unknown” colonies, i.e. not found during a survey, are not shown as they accounted for a low fraction of all colonies. However, they do account for missing fractions when the Healthy, SCTLD, and Dead fractions do not sum to 1.



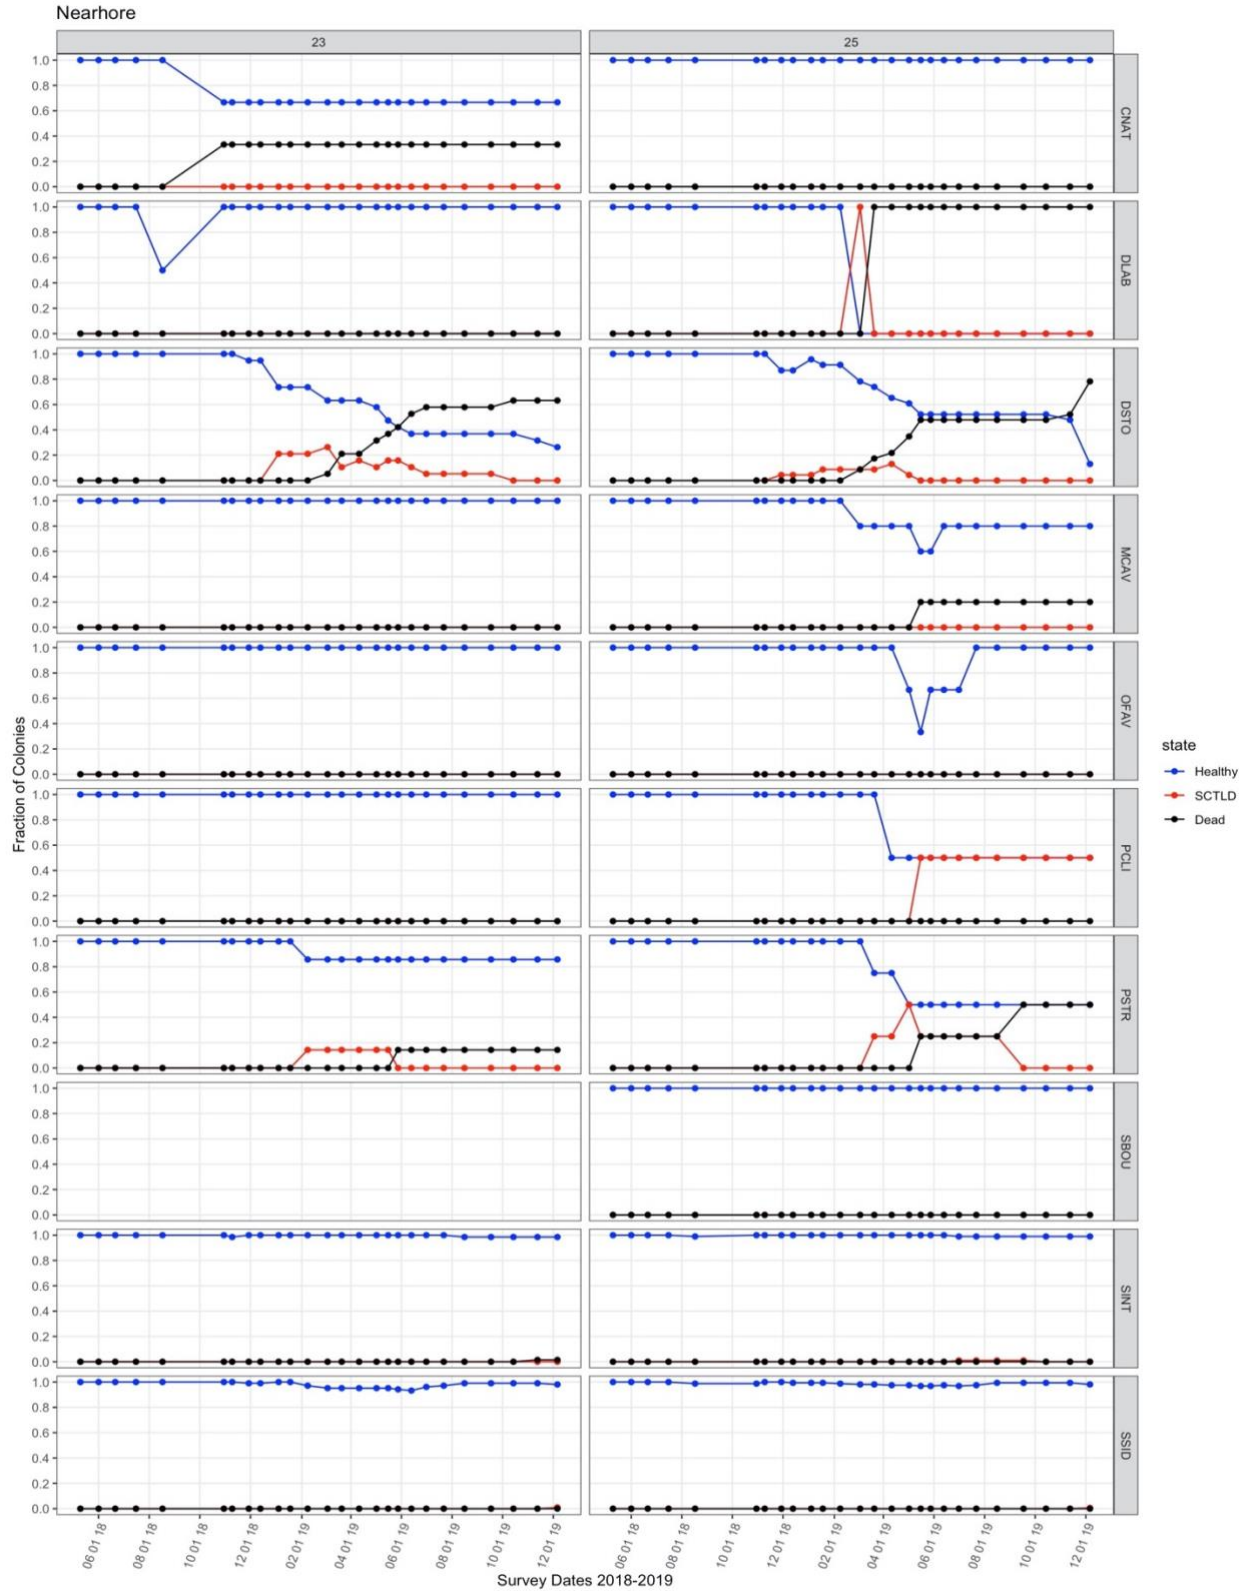

**Supplemental Figure 6. Temporal dynamics of SCTLD for each species at the nearshore site quadrats.** Fraction of “unknown” colonies, i.e. not found during a survey, are not shown as they accounted for a low fraction of all colonies. However, they do account for missing fractions when the Healthy, SCTLD, and Dead fractions do not sum to 1.

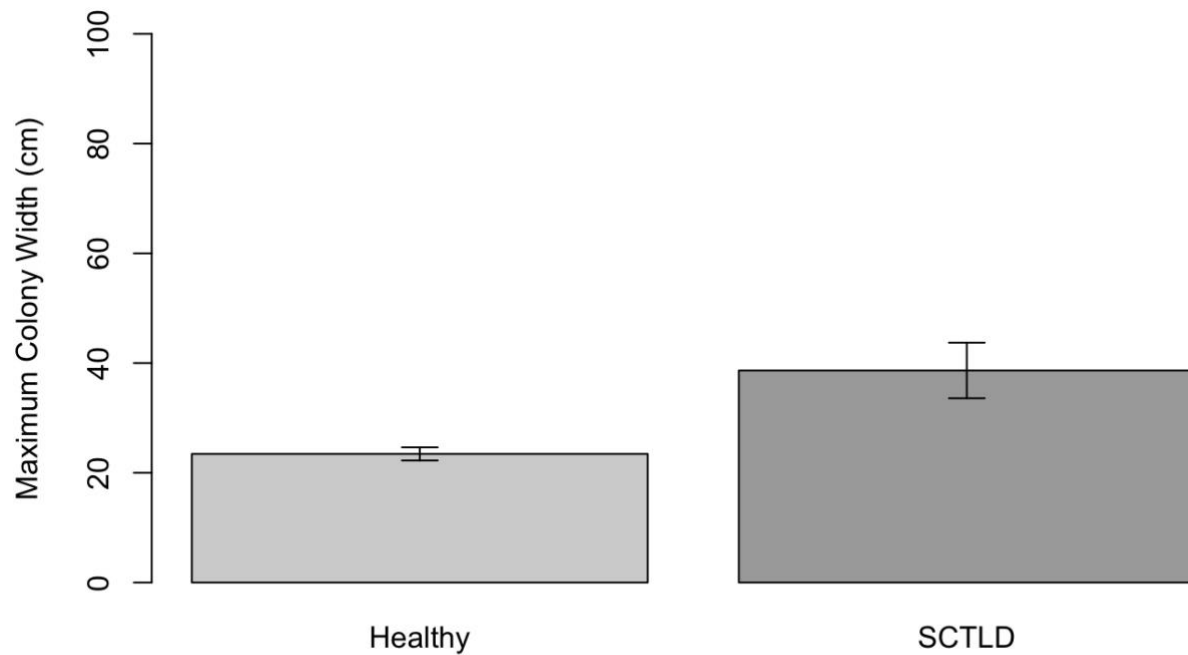

**Supplemental Figure 7. Size dependent susceptibility to SCTLD of the 11 susceptible species.** Maximum width of colonies that stayed healthy or showed signs of SCTLD during the survey period. Error bars are the 95% confidence intervals.

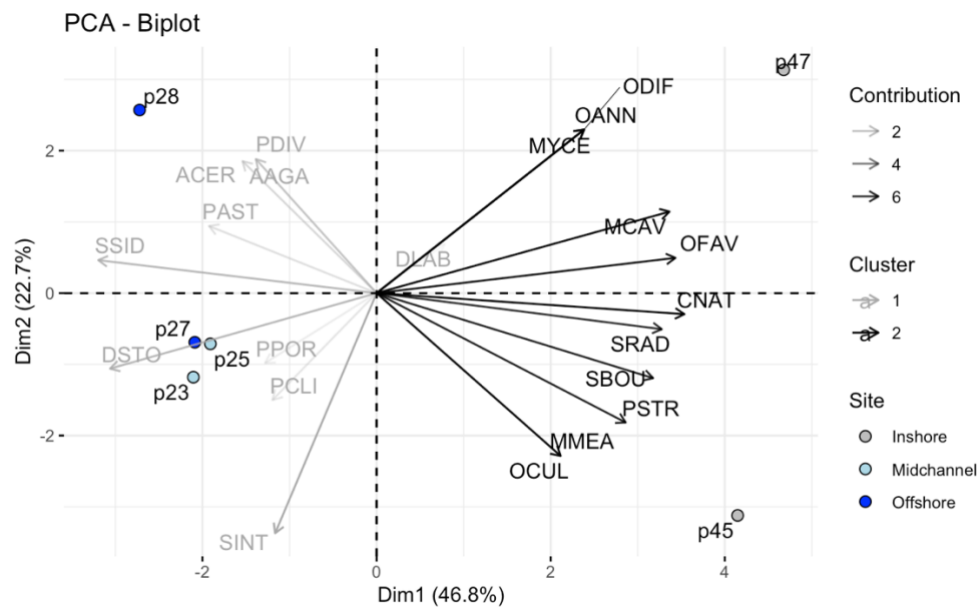

**Supplemental Figure 8. PCA biplot showing the proportion of variation in species composition at each quadrat explained by every species surveyed.**

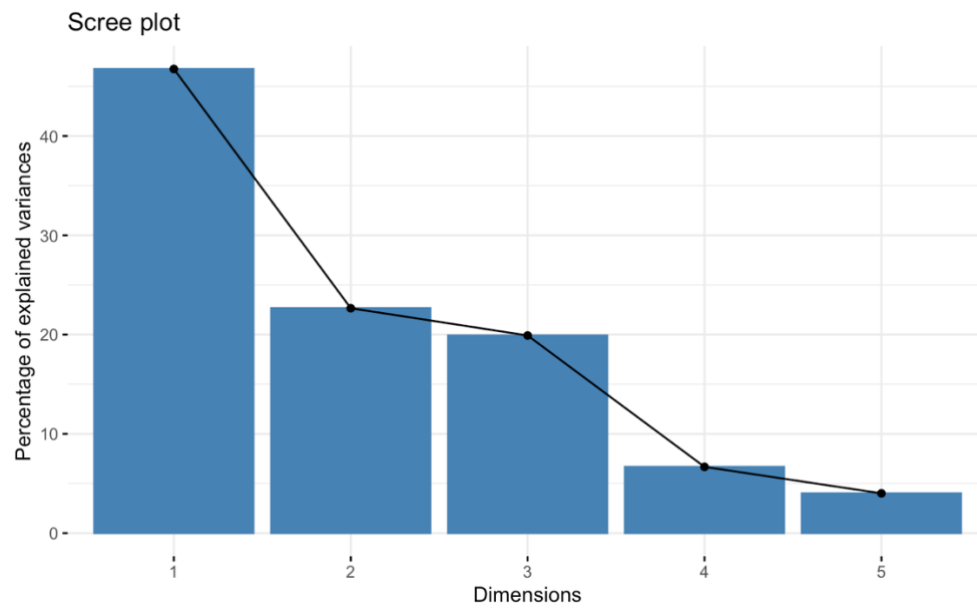

**Supplemental Figure 9. Percentage of explained variance per dimension of the above PCA analysis for all surveyed species.**

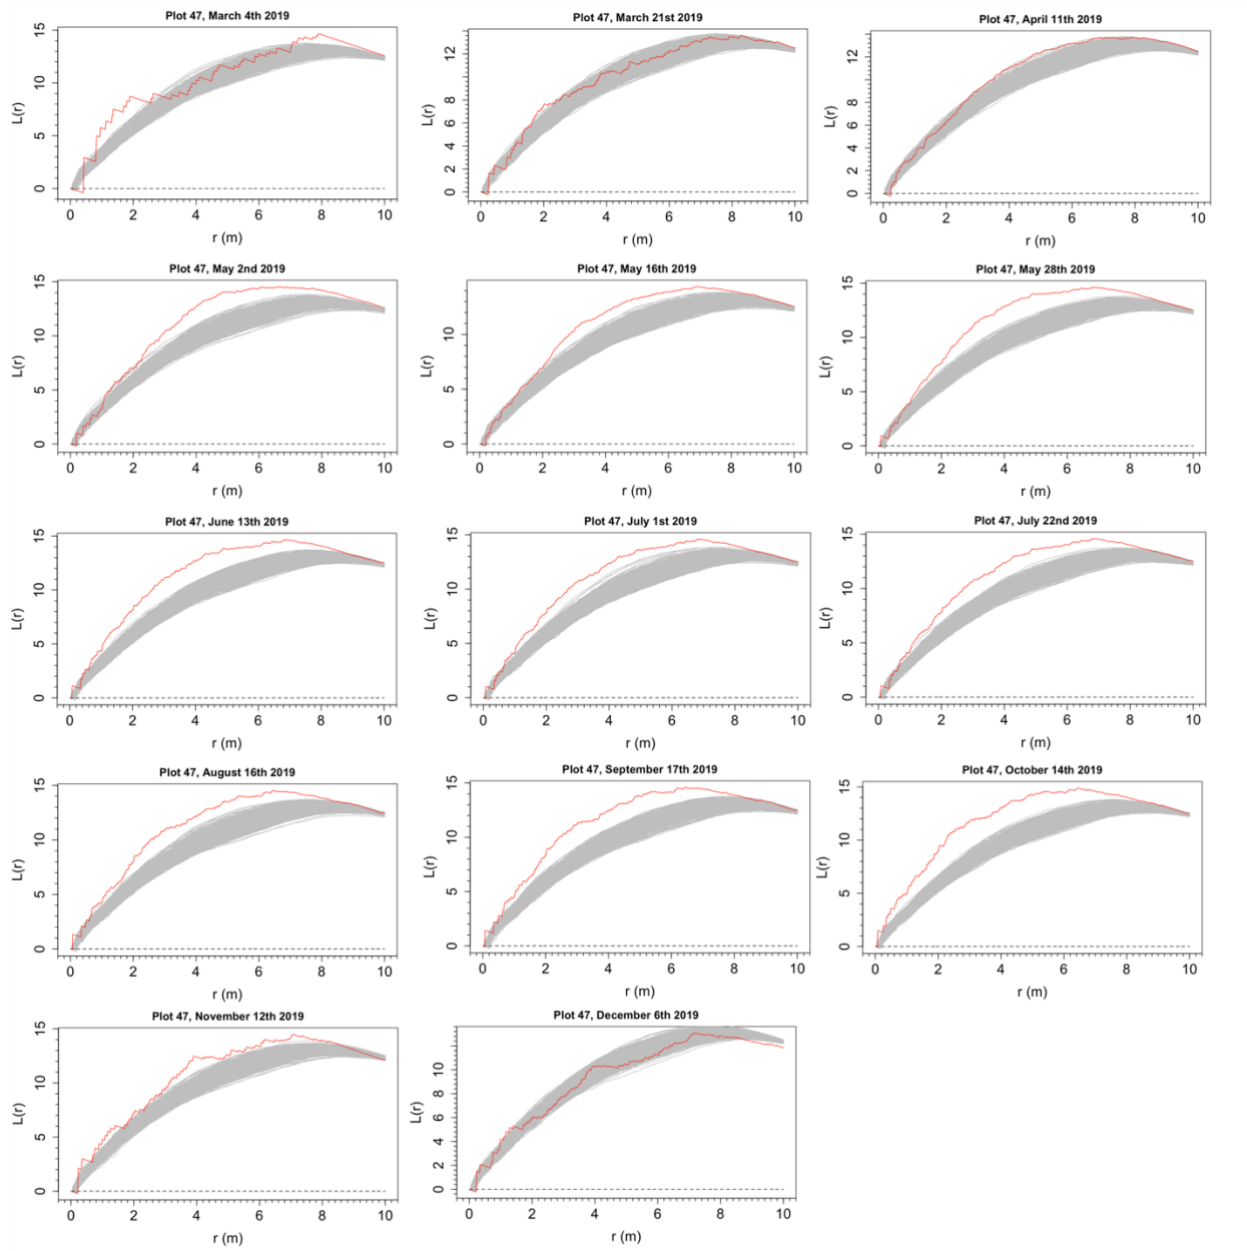

**Supplemental Figure 10. Ripley's K plots for quadrat 47 at the nearshore site for each time point considered.** The red line is the  $L(r)$  for the diseased colonies and the grey lines are the null distribution.

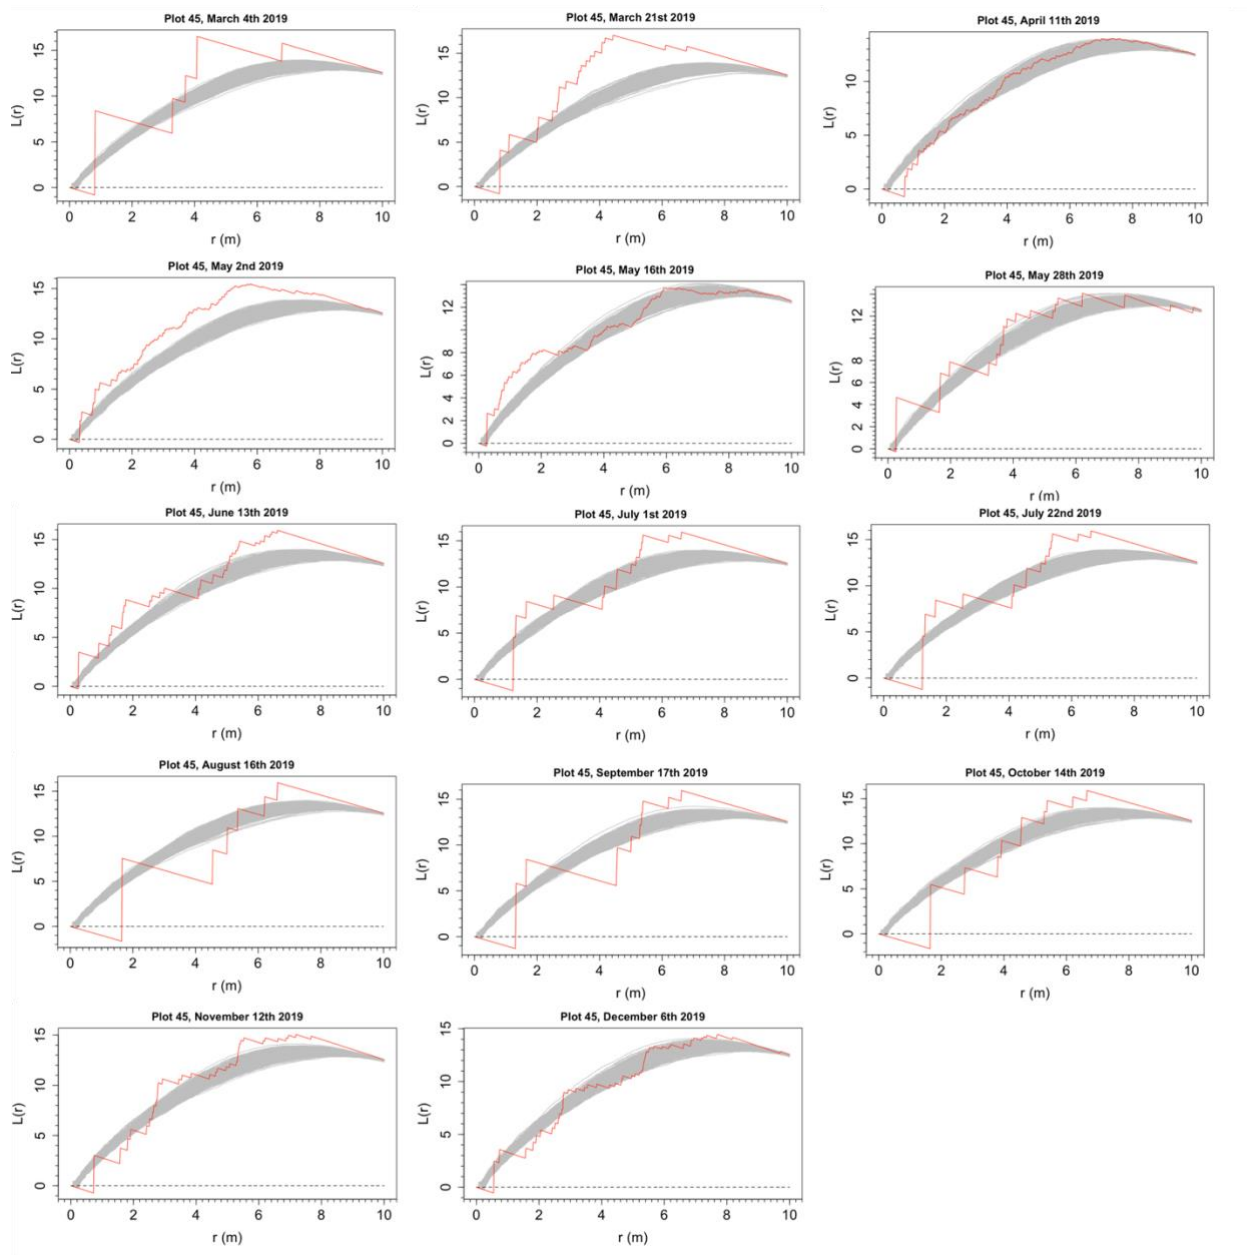

**Supplemental Figure 11. Ripley's K plots for quadrat 45 at the nearshore site for each time point considered.** The red line is the  $L(r)$  for the diseased colonies and the grey lines are the null distribution.
